# Supplementary material
Source: PubMed Central journal article supplement (PMC1959434)
Supplement: pnas_0703262104_14.pdf [file pnas_0703262104_14.pdf]

**Table 1.** List of essential metabolites and their characteristics. Essential metabolites are identified within nineteen environments specified by combinations of different carbon, phosphate, nitrogen, and sulfate sources, and aerobic/anaerobic conditions (SI Table 2). We present the essential metabolites in the descending order of the number of the participating reactions. Each essential metabolite is characterized as type A, B, C, or D, according to the cell growth profile under attenuation (Note 4).

1-A) Metabolites which are identified as essential for all nineteen growth conditions. The total number of the corresponding metabolites is 231.

| Name of metabolite                                    | No. of participating reactions |          |          | Growth condition relevant to each type |                       |                        |
|-------------------------------------------------------|--------------------------------|----------|----------|----------------------------------------|-----------------------|------------------------|
|                                                       | total                          | incoming | outgoing | A                                      | B                     | C                      |
| H+                                                    | 497                            | 378      | 226      |                                        |                       | 1-19                   |
| H <sub>2</sub> O                                      | 293                            | 82       | 231      |                                        |                       | 1-19                   |
| ATP                                                   | 176                            | 38       | 174      |                                        |                       | 1-19                   |
| Phosphate                                             | 149                            | 143      | 35       |                                        |                       | 1-19                   |
| ADP                                                   | 143                            | 141      | 35       |                                        |                       | 1-19                   |
| Nicotinamide adenine dinucleotide                     | 77                             | 42       | 51       |                                        | 1,3,5-7,9-11,13,15,17 | 2,4,8,12,14,16,18,19   |
| Nicotinamide adenine dinucleotide - reduced           | 72                             | 48       | 40       |                                        | 1,3,5-7,9-11,13,15,17 | 2,4,8,12,14,16,18,19   |
| CO <sub>2</sub>                                       | 60                             | 58       | 8        | 2,4,12,14,16,18,19                     | 1,3,9-11,13,15,17     | 5-8                    |
| Nicotinamide adenine dinucleotide phosphate           | 52                             | 45       | 20       | 1-4,7,9,11,12,14-19                    | 5,6,8,10,13           |                        |
| Pyruvate                                              | 51                             | 43       | 14       | 5                                      | 1,6,8,10,11,13,15,17  | 2-4,7,9,12,14,16,18,19 |
| Nicotinamide adenine dinucleotide phosphate - reduced | 50                             | 18       | 45       | 1-4,7,9,11,12,14-19                    | 5,6,8,10,13           |                        |
| L-Glutamate                                           | 46                             | 33       | 26       | 1-7,9,11,12,14-19                      | 13                    | 8,10                   |
| Coenzyme A                                            | 39                             | 24       | 23       |                                        | 1-4,6-19              | 5                      |
| ammonium                                              | 38                             | 34       | 7        | 1-7,11,12,14-19                        | 10,13                 | 8,9                    |
| AMP                                                   | 36                             | 33       | 8        | 2,4-6,8,10,12,18,19                    | 1,3,7,9,11,13-17      |                        |
| Acetyl-CoA                                            | 26                             | 14       | 18       |                                        | 1-4,6-19              | 5                      |
| 2-Oxoglutarate                                        | 25                             | 17       | 20       | 2,4,12,14-16,18,19                     | 1,3,5-7,9,11,13,17    | 8,10                   |
| acyl carrier protein                                  | 23                             | 18       | 8        | 1,2,5,7,9,11-19                        | 3,4,6,8,10            |                        |
| Phosphoenolpyruvate                                   | 23                             | 4        | 21       |                                        | 1,5-11,13,15,17       | 2-4,12,14,16,18,19     |
| L-Aspartate                                           | 20                             | 8        | 15       | 1,3,11,13,15-17                        | 2,4-10,12,14,18,19    |                        |
| L-Glutamine                                           | 15                             | 2        | 13       | 1-19                                   |                       |                        |
| Glyceraldehyde 3-phosphate                            | 14                             | 13       | 10       | 5,6,8,10                               | 7,9                   | 1-4,11-19              |
| CMP                                                   | 14                             | 12       | 6        | 1-19                                   |                       |                        |
| Glycerol 3-phosphate                                  | 14                             | 10       | 6        | 1-19                                   |                       |                        |
| GTP                                                   | 13                             | 2        | 13       | 1,3,5,6,8,10,11,15-18                  | 2,4,7,9,12-14,19      |                        |
| 5-Phospho-alpha-D-ribose 1-diphosphate                | 12                             | 2        | 12       | 1-15,17-19                             | 16                    |                        |
| Dihydroxyacetone phosphate                            | 12                             | 10       | 8        | 5-10                                   | 1-4,11-19             |                        |
| L-Alanine                                             | 12                             | 7        | 10       | 1-19                                   |                       |                        |
| L-Serine                                              | 12                             | 7        | 9        |                                        | 1-19                  |                        |
| D-Fructose 6-phosphate                                | 12                             | 10       | 9        | 5-10                                   | 1-4,11-19             |                        |
| Malonyl-[acyl-carrier protein]                        | 11                             | 1        | 11       | 1-19                                   |                       |                        |
| D-Glucose 1-phosphate                                 | 11                             | 7        | 10       | 1-19                                   |                       |                        |
| GDP                                                   | 10                             | 8        | 5        | 1,3,5-8,10,11,15-18                    | 2,4,9,12-14,19        |                        |
| Oxaloacetate                                          | 10                             | 7        | 5        | 2,4,12-16                              | 1,3,5-11,17-19        |                        |
| Reduced thioredoxin                                   | 10                             | 1        | 9        | 5,6,8,10,18                            | 1-4,7,9,11-17,19      |                        |
| FAD                                                   | 10                             | 2        | 9        | 2,4,12-16,18                           | 1,3,7-11,17,19        | 5,6                    |
| D-Glucose 6-phosphate                                 | 10                             | 9        | 4        | 4-10                                   | 1,3,11,13,15,17       | 2,12,14,16,18,19       |
| Oxidized thioredoxin                                  | 10                             | 9        | 1        | 5,6,8,10,18                            | 1-4,7,9,11-17,19      |                        |

| Name of metabolite               | No. of participating reactions |          |          | Growth condition relevant to each type |                     |   |
|----------------------------------|--------------------------------|----------|----------|----------------------------------------|---------------------|---|
|                                  | total                          | incoming | outgoing | A                                      | B                   | C |
| UMP                              | 9                              | 8        | 2        | 1,3,5-8,10,11,15,17,18                 | 2,4,9,12-14,16,19   |   |
| CTP                              | 9                              | 3        | 8        | 1-19                                   |                     |   |
| S-Adenosyl-L-methionine          | 9                              | 3        | 8        | 1-19                                   |                     |   |
| L-Cysteine                       | 9                              | 3        | 7        | 1-19                                   |                     |   |
| alpha-D-Ribose 5-phosphate       | 9                              | 9        | 4        | 5,6,8,10,18                            | 1-4,7,9,11-17,19    |   |
| UDPglucose                       | 8                              | 4        | 7        | 1-19                                   |                     |   |
| 5,6,7,8-Tetrahydrofolate         | 8                              | 6        | 5        |                                        | 1-19                |   |
| Acetoacetyl-ACP                  | 8                              | 2        | 6        | 1-19                                   |                     |   |
| UDP                              | 8                              | 7        | 3        | 1,3,5,6,8,10,11,15,17,18               | 2,4,7,9,12-14,16,19 |   |
| UTP                              | 8                              | 2        | 8        | 1,3-6,8,10,11,13-15,17,18              | 2,7,9,12,16,19      |   |
| Succinyl-CoA                     | 8                              | 3        | 6        | 2,4,12-16,18,19                        | 1,3,5-11,17         |   |
| L-Threonine                      | 8                              | 5        | 5        | 1-12,14-19                             | 13                  |   |
| Putrescine                       | 8                              | 5        | 5        | 1-7,9-19                               | 8                   |   |
| Glycine                          | 8                              | 5        | 6        | 5,6,8,10                               | 1-4,7,9,11-19       |   |
| GMP                              | 8                              | 6        | 3        | 1-19                                   |                     |   |
| Spermidine                       | 7                              | 3        | 4        | 1-19                                   |                     |   |
| IMP                              | 7                              | 4        | 4        | 1-19                                   |                     |   |
| Phosphatidylglycerol             | 7                              | 2        | 6        | 1-19                                   |                     |   |
| L-Arginine                       | 6                              | 3        | 5        | 1-7,9-17,19                            | 18                  | 8 |
| L-Lysine                         | 6                              | 4        | 3        | 1-19                                   |                     |   |
| 5,10-Methylenetetrahydrofolate   | 6                              | 3        | 4        |                                        | 1-19                |   |
| Chorismate                       | 6                              | 1        | 5        | 1-19                                   |                     |   |
| D-Alanine                        | 6                              | 4        | 5        | 1-19                                   |                     |   |
| L-Proline                        | 6                              | 4        | 3        | 1-19                                   |                     |   |
| L-Asparagine                     | 6                              | 4        | 3        | 1-19                                   |                     |   |
| UDP-N-acetyl-D-glucosamine       | 6                              | 2        | 5        | 1-19                                   |                     |   |
| D-Glucosamine 6-phosphate        | 5                              | 4        | 2        | 1-19                                   |                     |   |
| Nicotinate D-ribonucleotide      | 5                              | 3        | 2        | 1-19                                   |                     |   |
| dGTP                             | 5                              | 2        | 4        | 1-19                                   |                     |   |
| Iminoaspartate                   | 5                              | 4        | 1        | 1-19                                   |                     |   |
| D-Ribulose 5-phosphate           | 5                              | 4        | 4        | 5,6,8,10,18                            | 1-4,7,9,11-17,19    |   |
| Myristoyl-ACP (n-C14:0ACP)       | 5                              | 2        | 3        | 1-19                                   |                     |   |
| 3-Methyl-2-oxobutanoate          | 5                              | 2        | 4        | 1-12,14-19                             | 13                  |   |
| L-Methionine                     | 5                              | 3        | 2        | 1-19                                   |                     |   |
| L-Tryptophan                     | 5                              | 4        | 3        | 1-8,10-19                              |                     | 9 |
| dTMP                             | 5                              | 4        | 2        | 1-19                                   |                     |   |
| phosphatidate                    | 5                              | 4        | 2        | 1-19                                   |                     |   |
| L-Valine                         | 5                              | 4        | 3        | 1-19                                   |                     |   |
| Bicarbonate                      | 5                              | 2        | 5        | 1-19                                   |                     |   |
| dCTP                             | 5                              | 2        | 4        | 1-19                                   |                     |   |
| dUMP                             | 5                              | 3        | 3        | 1,3,5-8,10,11,15,17,18                 | 2,4,9,12-14,16,19   |   |
| L-Glutamate 5-semialdehyde       | 4                              | 3        | 1        | 1-19                                   |                     |   |
| meso-2,6-Diaminoheptanedioate    | 4                              | 2        | 3        | 1-19                                   |                     |   |
| CMP-3-deoxy-D-manno-octulosonate | 4                              | 1        | 3        | 1-19                                   |                     |   |
| Undecaprenyl diphosphate         | 4                              | 3        | 1        | 1-19                                   |                     |   |
| L-Isoleucine                     | 4                              | 3        | 3        | 1-12,14-19                             | 13                  |   |
| Phosphatidylethanolamine         | 4                              | 2        | 3        | 1-19                                   |                     |   |

| Name of metabolite                                      | No. of participating reactions |          |          | Growth condition relevant to each type |                    |                    |
|---------------------------------------------------------|--------------------------------|----------|----------|----------------------------------------|--------------------|--------------------|
|                                                         | total                          | incoming | outgoing | A                                      | B                  | C                  |
| L-Leucine                                               | 4                              | 3        | 2        | 1-12,14-19                             | 13                 |                    |
| L-Histidine                                             | 4                              | 3        | 2        | 1-19                                   |                    |                    |
| Hexadecenoyl-ACP (n-C16:1ACP)                           | 4                              | 2        | 2        | 1-19                                   |                    |                    |
| 1-Pyrroline-5-carboxylate                               | 4                              | 2        | 2        | 1-19                                   |                    |                    |
| Sulfite                                                 | 4                              | 4        | 1        | 1-19                                   |                    |                    |
| Carbamoyl phosphate                                     | 4                              | 3        | 2        | 1-19                                   |                    |                    |
| D-Erythrose 4-phosphate                                 | 4                              | 3        | 4        |                                        | 1-19               |                    |
| 3-Phospho-D-glycerate                                   | 4                              | 3        | 3        |                                        | 1,3,5-11,13,15,17  | 2,4,12,14,16,18,19 |
| CDPdiacylglycerol                                       | 4                              | 3        | 4        | 1-19                                   |                    |                    |
| Xanthosine 5'-phosphate                                 | 4                              | 2        | 2        | 1-19                                   |                    |                    |
| dTTP                                                    | 4                              | 1        | 4        | 1-19                                   |                    |                    |
| L-Tyrosine                                              | 4                              | 2        | 4        | 1-19                                   |                    |                    |
| L-Homocysteine                                          | 4                              | 3        | 2        | 1-19                                   |                    |                    |
| dATP                                                    | 4                              | 2        | 3        | 2,4-10,12-14,16,18,19                  | 1,3,11,15,17       |                    |
| 10-Formyltetrahydrofolate                               | 4                              | 3        | 4        |                                        | 1-19               |                    |
| R-3-hydroxy-myristoyl-ACP                               | 3                              | 2        | 2        | 1-19                                   |                    |                    |
| Octadecenoyl-ACP (n-C18:1ACP)                           | 3                              | 2        | 1        | 1-19                                   |                    |                    |
| Palmitoyl-ACP (n-C16:0ACP)                              | 3                              | 2        | 1        | 1-19                                   |                    |                    |
| (S)-Dihydroorotate                                      | 3                              | 1        | 3        | 1-19                                   |                    |                    |
| Tetradecenoyl-ACP (n-C14:1ACP)                          | 3                              | 2        | 1        | 1-19                                   |                    |                    |
| 2-Oxobutanoate                                          | 3                              | 1        | 2        | 1-12,14-19                             | 13                 |                    |
| 5-Amino-1-(5-Phospho-D-riboseyl)imidazole-4-carboxamide | 3                              | 3        | 2        | 1-19                                   |                    |                    |
| L-Phenylalanine                                         | 3                              | 2        | 3        | 1-19                                   |                    |                    |
| phosphatidylserine                                      | 3                              | 1        | 3        | 1-19                                   |                    |                    |
| UDP-2,3-bis(3-hydroxytetradecanoyl)glucosamine          | 3                              | 1        | 2        | 1-19                                   |                    |                    |
| L-Homoserine                                            | 3                              | 1        | 3        | 1,3,11,13,15-17                        | 2,4-10,12,14,18,19 |                    |
| Undecaprenyl phosphate                                  | 3                              | 1        | 2        | 1-19                                   |                    |                    |
| (R)-Pantothenate                                        | 3                              | 2        | 1        | 1-19                                   |                    |                    |
| Orotate                                                 | 3                              | 3        | 1        | 1-19                                   |                    |                    |
| L-Aspartate 4-semialdehyde                              | 3                              | 2        | 3        | 1,3,11,13,15-17                        | 2,4-10,12,14,18,19 |                    |
| Sedoheptulose 7-phosphate                               | 3                              | 2        | 3        |                                        | 1-19               |                    |
| N2-Formyl-N1-(5-phospho-D-riboseyl)glycinamide          | 3                              | 2        | 2        | 1-19                                   |                    |                    |
| 5-Methyltetrahydrofolate                                | 3                              | 1        | 2        | 1-19                                   |                    |                    |
| Hydrogen sulfide                                        | 3                              | 2        | 2        | 1-19                                   |                    |                    |
| 7,8-Dihydrofolate                                       | 3                              | 3        | 1        | 1-19                                   |                    |                    |
| dTDP                                                    | 3                              | 3        | 2        | 1-19                                   |                    |                    |
| glycogen                                                | 3                              | 1        | 2        | 1-19                                   |                    |                    |
| Dodecanoyl-ACP (n-C12:0ACP)                             | 3                              | 1        | 2        | 1-19                                   |                    |                    |
| 4-(1-D-Ribitylamino)-5-aminouracil                      | 3                              | 2        | 1        | 1-19                                   |                    |                    |
| Prephenate                                              | 3                              | 1        | 2        | 1-19                                   |                    |                    |

| Name of metabolite                                                                                   | No. of participating reactions |          |          | Growth condition relevant to each type |      |   |
|------------------------------------------------------------------------------------------------------|--------------------------------|----------|----------|----------------------------------------|------|---|
|                                                                                                      | total                          | incoming | outgoing | A                                      | B    | C |
| 5-amino-1-(5-phospho-D-ribose)imidazole                                                              | 3                              | 1        | 2        | 1-19                                   |      |   |
| KDO(2)-lipid IV(A)                                                                                   | 3                              | 1        | 2        | 1-19                                   |      |   |
| N1-(5-Phospho-D-ribose)glycinamide                                                                   | 3                              | 2        | 3        | 1-19                                   |      |   |
| 5-[(5-phospho-1-deoxyribulos-1-ylamino)methylideneamino]-1-(5-phosphoribosyl)imidazole-4-carboxamide | 2                              | 1        | 1        | 1-19                                   |      |   |
| Phosphatidylglycerophosphate                                                                         | 2                              | 1        | 2        | 1-19                                   |      |   |
| UDP-N-acetylmuramoyl-L-alanine                                                                       | 2                              | 1        | 1        | 1-19                                   |      |   |
| N-Succinyl-L-2,6-diaminoheptanedioate                                                                | 2                              | 1        | 2        | 1-19                                   |      |   |
| 2-Dehydro-3-deoxy-D-arabino-heptonate 7-phosphate                                                    | 2                              | 1        | 1        | 1-19                                   |      |   |
| O-Phospho-L-serine                                                                                   | 2                              | 1        | 1        |                                        | 1-19 |   |
| UDP-N-acetylmuramate                                                                                 | 2                              | 1        | 1        | 1-19                                   |      |   |
| (S)-2-[5-Amino-1-(5-phospho-D-ribose)imidazole-4-carboxamido]succinate                               | 2                              | 2        | 2        | 1-19                                   |      |   |
| UDP-N-acetylmuramoyl-L-alanyl-D-gamma-glutamyl-meso-2,6-diaminopimelate                              | 2                              | 1        | 1        | 1-19                                   |      |   |
| 3-Carboxy-3-hydroxy-4-methylpentanoate                                                               | 2                              | 2        | 1        | 1-12,14-19                             | 13   |   |
| 2,3-Bis(3-hydroxytetradecanoyl)-beta-D-glucosaminyl 1-phosphate                                      | 2                              | 1        | 1        | 1-19                                   |      |   |
| 3-Deoxy-D-manno-octulosonate 8-phosphate                                                             | 2                              | 1        | 1        | 1-19                                   |      |   |
| N-((R)-4-Phosphopantothenoyl)-L-cysteine                                                             | 2                              | 1        | 1        | 1-19                                   |      |   |
| Peptidoglycan subunit of <i>Escherichia coli</i>                                                     | 2                              | 1        | 1        | 1-19                                   |      |   |
| Adenosine 5'-phosphosulfate                                                                          | 2                              | 1        | 1        | 1-19                                   |      |   |
| Dihydropteroate                                                                                      | 2                              | 1        | 1        | 1-19                                   |      |   |
| 3-Dehydroshikimate                                                                                   | 2                              | 2        | 2        | 1-19                                   |      |   |
| 1-(5-Phosphoribosyl)-AMP                                                                             | 2                              | 1        | 1        | 1-19                                   |      |   |
| 4-Methyl-2-oxopentanoate                                                                             | 2                              | 1        | 1        | 1-12,14-19                             | 13   |   |
| D-Glycero-D-manno-heptose 7-phosphate                                                                | 2                              | 1        | 1        | 1-19                                   |      |   |
| 2,3,4,5-Tetrahydrodipicolinate                                                                       | 2                              | 1        | 1        | 1-19                                   |      |   |
| 3-Phosphohydroxypyruvate                                                                             | 2                              | 1        | 1        |                                        | 1-19 |   |

| Name of metabolite                                                                               | No. of participating reactions |          |          | Growth condition relevant to each type |    |   |
|--------------------------------------------------------------------------------------------------|--------------------------------|----------|----------|----------------------------------------|----|---|
|                                                                                                  | total                          | incoming | outgoing | A                                      | B  | C |
| D-Glycero-D-manno-heptose 1-phosphate                                                            | 2                              | 1        | 1        | 1-19                                   |    |   |
| D-erythro-1-(Imidazol-4-yl)glycerol 3-phosphate Sulfate                                          | 2                              | 1        | 1        | 1-19                                   |    |   |
| UDP-3-O-(3-hydroxytetradecanoyl)-N-acetylglucosamine                                             | 2                              | 1        | 2        | 1-19                                   |    |   |
| 2-Amino-4-hydroxy-6-(D-erythro-1,2,3-trihydroxypropyl)-7,8-dihydropteridine                      | 2                              | 1        | 1        | 1-19                                   |    |   |
| UDP-3-O-(3-hydroxytetradecanoyl)-D-glucosamine                                                   | 2                              | 1        | 1        | 1-19                                   |    |   |
| Orotidine 5'-phosphate                                                                           | 2                              | 1        | 2        | 1-19                                   |    |   |
| UDP-N-acetyl-3-O-(1-carboxyvinyl)-D-glucosamine                                                  | 2                              | 1        | 1        | 1-19                                   |    |   |
| 6-hydroxymethyl dihydropterin                                                                    | 2                              | 1        | 1        | 1-19                                   |    |   |
| O-Acetyl-L-serine                                                                                | 2                              | 1        | 2        | 1-19                                   |    |   |
| UDP-N-acetylmuramoyl-L-alanyl-D-glutamyl-meso-2,6-diaminopimeloyl-D-alanyl-D-alanine             | 2                              | 1        | 1        | 1-19                                   |    |   |
| UDP-N-acetylmuramoyl-L-alanyl-D-glutamate                                                        | 2                              | 1        | 1        | 1-19                                   |    |   |
| Cardiolipin                                                                                      | 2                              | 1        | 2        | 1-19                                   |    |   |
| (R)-2,3-Dihydroxy-3-methylbutanoate                                                              | 2                              | 1        | 1        | 1-12,14-19                             | 13 |   |
| (S)-2-Acetolactate                                                                               | 2                              | 1        | 1        | 1-12,14-19                             | 13 |   |
| 3'-Phosphoadenylyl sulfate                                                                       | 2                              | 1        | 1        | 1-19                                   |    |   |
| 1-(5-Phosphoribosyl)-ATP                                                                         | 2                              | 1        | 1        | 1-19                                   |    |   |
| 2,3,2'3'-Tetrakis(beta-hydroxymyristoyl)-D-glucosaminyl-1,6-beta-D-glucosamine 1,4'-bisphosphate | 2                              | 1        | 1        | 1-19                                   |    |   |
| Shikimate 5-phosphate                                                                            | 2                              | 2        | 1        | 1-19                                   |    |   |
| (R)-Pantoate                                                                                     | 2                              | 1        | 1        | 1-19                                   |    |   |
| 2-Dehydropantoate                                                                                | 2                              | 1        | 1        | 1-19                                   |    |   |
| CDPethanolamine                                                                                  | 2                              | 1        | 2        | 1-19                                   |    |   |
| 5-amino-1-(5-phospho-D-ribosyl)imidazole-4-carboxylate                                           | 2                              | 2        | 2        | 1-19                                   |    |   |
| 5-Phospho-beta-D-ribosylamine                                                                    | 2                              | 2        | 1        | 1-19                                   |    |   |
| N-Succinyl-2-L-amino-6-oxoheptanedioate                                                          | 2                              | 2        | 1        | 1-19                                   |    |   |
| D-4'-Phosphopantothenate                                                                         | 2                              | 1        | 1        | 1-19                                   |    |   |

| Name of metabolite                                                                                             | No. of participating reactions |          |          | Growth condition relevant to each type |    |   |
|----------------------------------------------------------------------------------------------------------------|--------------------------------|----------|----------|----------------------------------------|----|---|
|                                                                                                                | total                          | incoming | outgoing | A                                      | B  | C |
| 3-Deoxy-D-manno-2-octulosonate                                                                                 | 2                              | 1        | 1        | 1-19                                   |    |   |
| ADP-L-glycero-D-manno-heptose                                                                                  | 2                              | 1        | 1        | 1-19                                   |    |   |
| beta-Alanine                                                                                                   | 2                              | 1        | 1        | 1-19                                   |    |   |
| D-Alanyl-D-alanine                                                                                             | 2                              | 1        | 2        | 1-19                                   |    |   |
| O-Succinyl-L-homoserine                                                                                        | 2                              | 1        | 1        | 1-19                                   |    |   |
| Quinolinate                                                                                                    | 2                              | 1        | 1        | 1-19                                   |    |   |
| 2-(Formamido)-N1-(5-phospho-D-ribosyl)acetamide                                                                | 2                              | 1        | 1        | 1-19                                   |    |   |
| D-Arabinose 5-phosphate                                                                                        | 2                              | 1        | 2        | 1-19                                   |    |   |
| 1-(5-Phosphoribosyl)-5-[(5-phosphoribosylamino)methylideneamino]imidazole-4-carboxamide                        | 2                              | 1        | 1        | 1-19                                   |    |   |
| lipopolysaccharide                                                                                             | 2                              | 1        | 1        | 1-19                                   |    |   |
| 6-hydroxymethyl-dihydropterin pyrophosphate                                                                    | 2                              | 1        | 1        | 1-19                                   |    |   |
| Shikimate                                                                                                      | 2                              | 1        | 2        | 1-19                                   |    |   |
| Undecaprenyl-diphospho-N-acetylmuramoyl-L-alanyl-D-glutamyl-meso-2,6-diaminopimeloyl-D-alanyl-D-alanine        | 2                              | 1        | 1        | 1-19                                   |    |   |
| Undecaprenyl-diphospho-N-acetylmuramoyl-(N-acetylglucosamine)-L-ala-D-glu-meso-2,6-diaminopimeloyl-D-ala-D-ala | 2                              | 1        | 1        | 1-19                                   |    |   |
| 5-phosphoribosyl-5-carboxyaminoimidazole                                                                       | 2                              | 2        | 1        | 1-19                                   |    |   |
| 3-Carboxy-2-hydroxy-4-methylpentanoate                                                                         | 2                              | 1        | 2        | 1-12,14-19                             | 13 |   |
| N-Acetyl-D-glucosamine 1-phosphate                                                                             | 2                              | 1        | 1        | 1-19                                   |    |   |
| L-Cystathionine                                                                                                | 2                              | 1        | 1        | 1-19                                   |    |   |
| (S)-3-Methyl-2-oxopentanoate                                                                                   | 2                              | 2        | 1        | 1-12,14-19                             | 13 |   |
| 5-O-(1-Carboxyvinyl)-3-phosphoshikimate                                                                        | 2                              | 1        | 2        | 1-19                                   |    |   |
| 2-Amino-4-hydroxy-6-(erythro-1,2,3-trihydroxypropyl)dihydropteridine triphosphate                              | 2                              | 1        | 1        | 1-19                                   |    |   |
| D-Glycero-D-manno-heptose 1,7-bisphosphate                                                                     | 2                              | 1        | 1        | 1-19                                   |    |   |
| 3-(Imidazol-4-yl)-2-oxopropyl phosphate                                                                        | 2                              | 1        | 1        | 1-19                                   |    |   |

| Name of metabolite                                        | No. of participating reactions |          |          | Growth condition relevant to each type |                    |   |
|-----------------------------------------------------------|--------------------------------|----------|----------|----------------------------------------|--------------------|---|
|                                                           | total                          | incoming | outgoing | A                                      | B                  | C |
| 3,4-dihydroxy-2-butanone 4-phosphate                      | 2                              | 1        | 1        | 1-19                                   |                    |   |
| KDO(2)-lipid IV(A) with laurate                           | 2                              | 1        | 1        | 1-19                                   |                    |   |
| 2-Isopropylmalate                                         | 2                              | 2        | 2        | 1-12,14-19                             | 13                 |   |
| KDO-lipid IV(A)                                           | 2                              | 1        | 1        | 1-19                                   |                    |   |
| ADP-D-glycero-D-manno-heptose                             | 2                              | 1        | 1        | 1-19                                   |                    |   |
| KDO(2)-lipid (A)                                          | 2                              | 1        | 1        | 1-19                                   |                    |   |
| N6-(1,2-Dicarboxyethyl)-AMP                               | 2                              | 2        | 1        | 1-19                                   |                    |   |
| 5-Formamido-1-(5-phospho-D-ribose)imidazole-4-carboxamide | 2                              | 2        | 2        | 1-19                                   |                    |   |
| Lipid A Disaccharide                                      | 2                              | 1        | 1        | 1-19                                   |                    |   |
| 2,3-Dihydrodipicolinate                                   | 2                              | 1        | 1        | 1-19                                   |                    |   |
| 3-Dehydroquininate                                        | 2                              | 2        | 1        | 1-19                                   |                    |   |
| 4-Phospho-L-aspartate                                     | 2                              | 2        | 2        | 1,3,11,13,15-17                        | 2,4-10,12,14,18,19 |   |
| S-Adenosylmethioninamine                                  | 2                              | 1        | 2        | 1-19                                   |                    |   |
| 3-Carboxy-4-methyl-2-oxopentanoate                        | 2                              | 1        | 1        | 1-12,14-19                             | 13                 |   |
| Phenylpyruvate                                            | 2                              | 2        | 1        | 1-19                                   |                    |   |
| D-Glucosamine 1-phosphate                                 | 2                              | 1        | 2        | 1-19                                   |                    |   |
| Dephospho-CoA                                             | 2                              | 1        | 1        | 1-19                                   |                    |   |
| ADPglucose                                                | 2                              | 1        | 1        | 1-19                                   |                    |   |
| 4-Aminobenzoate                                           | 2                              | 1        | 1        | 1-19                                   |                    |   |
| L-Histidinol phosphate                                    | 2                              | 1        | 1        | 1-19                                   |                    |   |
| LL-2,6-Diaminoheptanedioate                               | 2                              | 2        | 1        | 1-19                                   |                    |   |
| Dihydroneopterin monophosphate                            | 2                              | 1        | 1        | 1-19                                   |                    |   |
| Pantetheine 4'-phosphate                                  | 2                              | 1        | 1        | 1-19                                   |                    |   |
| N-Carbamoyl-L-aspartate                                   | 2                              | 2        | 1        | 1-19                                   |                    |   |
| (R)-2,3-Dihydroxy-3-methylpentanoate                      | 2                              | 1        | 1        | 1-12,14-19                             | 13                 |   |
| Malonyl-CoA                                               | 2                              | 2        | 2        | 1-19                                   |                    |   |
| 4-amino-4-deoxychorismate                                 | 2                              | 1        | 1        | 1-19                                   |                    |   |
| D-Glutamate                                               | 2                              | 1        | 2        | 1-19                                   |                    |   |
| 3-(4-Hydroxyphenyl)pyruvate                               | 2                              | 2        | 1        | 1-19                                   |                    |   |
| L-Histidinol                                              | 2                              | 1        | 1        | 1-19                                   |                    |   |
| Deamino-NAD+                                              | 2                              | 1        | 1        | 1-19                                   |                    |   |
| (S)-2-Aceto-2-hydroxybutanoate                            | 2                              | 1        | 1        | 1-12,14-19                             | 13                 |   |

1-B) Essential metabolites which are identified only under specific growth conditions. The total number of the corresponding metabolites is 32. In the following list, we do not include the uptake sources for a given condition.

| Name of metabolite                                            | No. of participating reactions |          |          | Growth condition relevant to each type |                 |                    |                   |
|---------------------------------------------------------------|--------------------------------|----------|----------|----------------------------------------|-----------------|--------------------|-------------------|
|                                                               | total                          | incoming | outgoing | A                                      | B               | C                  | D                 |
| Diphosphate                                                   | 75                             | 74       | 8        | 13,14                                  |                 |                    |                   |
| Succinate                                                     | 22                             | 18       | 8        |                                        | 8,10            | 5                  |                   |
| Ubiquinol-8                                                   | 18                             | 15       | 4        |                                        |                 | 5-8                | 1,3,9-11,13,15,17 |
| Menaquinone 8                                                 | 17                             | 7        | 10       | 2,4,12,14,16,18                        |                 |                    |                   |
| Ubiquinone-8                                                  | 17                             | 4        | 14       |                                        |                 | 5-8                | 1,3,9-11,13,15,17 |
| Fumarate                                                      | 13                             | 10       | 8        | 2,4,12,14,16,18                        |                 | 5,6                |                   |
| L-Malate                                                      | 9                              | 5        | 6        |                                        |                 | 5,6                | 10                |
| Glyoxylate                                                    | 9                              | 5        | 4        | 5                                      |                 |                    |                   |
| FADH2                                                         | 8                              | 8        | 1        |                                        |                 | 5,6                |                   |
| Ornithine                                                     | 7                              | 5        | 5        | 1-7,9-19                               |                 |                    |                   |
| Citrate                                                       | 4                              | 3        | 2        | 2,4,12-16,18,19                        | 1,3,6,7,9,11,17 | 5                  |                   |
| Isocitrate                                                    | 3                              | 2        | 3        | 2,4,12-16,18,19                        | 1,3,6,7,9,11,17 | 5                  |                   |
| N-Acetyl-L-glutamate 5-semialdehyde                           | 3                              | 2        | 3        | 1-7,9-19                               |                 |                    |                   |
| C <sup>3</sup> -(3-Indolyl)-glycerol 3-phosphate              | 3                              | 1        | 2        | 1-8,10-19                              |                 |                    |                   |
| 6,7-Dimethyl-8-(1-D-ribityl)lumazine                          | 2                              | 1        | 1        | 1-11,13-19                             |                 |                    |                   |
| N-Acetyl-L-glutamyl 5-phosphate                               | 2                              | 2        | 1        | 1-7,9-19                               |                 |                    |                   |
| N2-Acetyl-L-ornithine                                         | 2                              | 1        | 2        | 1-7,9-19                               |                 |                    |                   |
| D-Glycerate 2-phosphate                                       | 2                              | 2        | 2        |                                        |                 | 2,4,12,14,16,18,19 |                   |
| N-Acetyl-L-glutamate                                          | 2                              | 1        | 1        | 1-7,9-19                               |                 |                    |                   |
| 5-Amino-6-(5'-phosphoribitylamino)uracil                      | 2                              | 1        | 1        | 1-11,13-19                             |                 |                    |                   |
| 1-(2-Carboxyphenylamino)-1-deoxy-D-ribose 5-phosphate         | 2                              | 1        | 1        | 1-8,10-19                              |                 |                    |                   |
| N-(5-Phospho-D-ribosyl)anthranilate                           | 2                              | 1        | 1        | 1-8,10-19                              |                 |                    |                   |
| N(omega)-(L-Arginino)succinate                                | 2                              | 2        | 1        | 1-7,9-17,19                            | 18              |                    |                   |
| 2,5-Diamino-6-(ribosylamino)-4-(3H)-pyrimidinone 5'-phosphate | 2                              | 1        | 1        | 1-11,13-19                             |                 |                    |                   |
| 5-Amino-6-(5'-phosphoribosylamino)uracil                      | 2                              | 1        | 1        | 1-11,13-19                             |                 |                    |                   |
| Anthranilate                                                  | 2                              | 1        | 1        | 1-8,10-19                              |                 |                    |                   |
| Riboflavin                                                    | 2                              | 1        | 1        | 1-11,13-19                             |                 |                    |                   |
| FMN                                                           | 2                              | 1        | 1        | 1-11,13-19                             |                 |                    |                   |
| L-Citrulline                                                  | 2                              | 1        | 2        | 1-7,9-17,19                            | 18              |                    |                   |
| 3-Phospho-D-glyceroyl phosphate                               | 2                              | 2        | 2        | 5-10                                   |                 | 2,4,12,14,16,18,19 |                   |
