# Supplementary material
Source: PubMed Central journal article supplement (PMC1959434)
Supplement: pnas_0703262104_15.pdf [file pnas_0703262104_15.pdf]

**Table 2.** Different growth conditions prepared by limitation of sources.

Constraints-based flux analysis was used to calculate predicted growth rates for the strains under 19 simulated growth conditions. For direct comparison with *in vivo* strains, experimentally determined substrate and oxygen uptake rates were used as input parameters for the computational simulations. We labeled each condition as in SI Table 1.

| <b>Description</b>            | (1)<br>minimal with<br>glucose, with<br>oxygen | (2)<br>anaerobic<br>minimal with<br>glucose | (3)<br>aerobic<br>minimal with<br>fructose | (4)<br>anaerobic<br>minimal with<br>fructose | (5)<br>aerobic<br>minimal with<br>acetate | (6)<br>aerobic<br>minimal with<br>succinate | (7)<br>aerobic<br>minimal with<br>pyruvate | (8)<br>aerobic<br>minimal with<br>arginine | (9)<br>aerobic<br>minimal with<br>tryptophan | (10)<br>aerobic<br>minimal with<br>glutamate |
|-------------------------------|------------------------------------------------|---------------------------------------------|--------------------------------------------|----------------------------------------------|-------------------------------------------|---------------------------------------------|--------------------------------------------|--------------------------------------------|----------------------------------------------|----------------------------------------------|
| <b>Medium<br/>Composition</b> | glucose: -10<br>oxygen: -20                    | glucose: -10<br>oxygen: 0                   | fructose: -10<br>oxygen: -20               | fructose: -10<br>oxygen: 0                   | acetate: -10<br>oxygen: -20               | succinate: -10<br>oxygen: -20               | pyruvate: -10<br>oxygen: -20               | arginine: -10<br>oxygen: -20               | tryptophan: -10<br>oxygen: -20               | glutamate: -10<br>oxygen: -20                |

| <b>Description</b>            | (11)<br>minimal with<br>glucose,<br>limited by C | (12)<br>anaerobic<br>minimal with<br>glucose,<br>limited by C | (13)<br>minimal with<br>glucose,<br>limited by P | (14)<br>anaerobic<br>minimal with<br>glucose,<br>limited by P | (15)<br>minimal with<br>glucose,<br>limited by N       | (16)<br>anaerobic<br>minimal with<br>glucose,<br>limited by N | (17)<br>minimal with<br>glucose,<br>limited by S       | (18)<br>anaerobic<br>minimal with<br>glucose,<br>limited by S | (19)<br>minimal with<br>glucose, with<br>low oxygen |
|-------------------------------|--------------------------------------------------|---------------------------------------------------------------|--------------------------------------------------|---------------------------------------------------------------|--------------------------------------------------------|---------------------------------------------------------------|--------------------------------------------------------|---------------------------------------------------------------|-----------------------------------------------------|
| <b>Medium<br/>Composition</b> | glucose: -6<br>oxygen: -20                       | glucose: -6<br>oxygen: 0                                      | glucose: -10<br>oxygen: -20<br>PI: -0.5          | glucose: -10<br>oxygen: 0<br>PI: -0.12                        | glucose: -10<br>oxygen: -20<br>NH <sub>4</sub> : -5.91 | glucose: -10<br>oxygen: 0<br>NH <sub>4</sub> : -1.38          | glucose: -10<br>oxygen: -20<br>SO <sub>4</sub> : -0.13 | glucose: -10<br>oxygen: 0<br>SO <sub>4</sub> : -0.03          | glucose: -10<br>oxygen: -0.6                        |
