# Supplementary material
Source: PubMed Central journal article supplement (PMC1959434)
Supplement: pnas_0703262104_16.pdf [file pnas_0703262104_16.pdf]

**Table 3.** List of the 227 organisms which were investigated for evolutionary conservation of intracellular metabolites found in *E. coli* (see the main text). We integrated the organisms from LIGAND database (<http://www.genome.ad.jp/ligand/>), and dropped some organisms due to their insufficient annotations.

## Eukaryotes

| Category |                | Species                                                 | No. of available metabolites | No. of available reactions |
|----------|----------------|---------------------------------------------------------|------------------------------|----------------------------|
| Animals  | Insects        | <i>Drosophila melanogaster</i>                          | 906                          | 882                        |
|          | Nematodes      | <i>Caenorhabditis elegans</i>                           | 929                          | 871                        |
| Plants   | Dicotyledons   | <i>Arabidopsis thaliana</i>                             | 1043                         | 996                        |
|          | Red alga       | <i>Cyanidioschyzon merolae</i>                          | 821                          | 758                        |
| Fungi    | Ascomycetes    | <i>Saccharomyces cerevisiae</i>                         | 928                          | 960                        |
|          |                | <i>Ashbya gossypii</i> ( <i>Eremothecium gossypii</i> ) | 873                          | 867                        |
|          |                | <i>Candida albicans</i>                                 | 1220                         | 1235                       |
|          |                | <i>Schizosaccharomyces pombe</i>                        | 824                          | 815                        |
|          | Basidiomycetes | <i>Cryptococcus neoformans</i> JEC21                    | 282                          | 172                        |
|          | Microsporidian | <i>Encephalitozoon cuniculi</i>                         | 262                          | 192                        |
| Protists | Protozoa       | <i>Plasmodium falciparum</i>                            | 544                          | 478                        |
|          |                | <i>Cryptosporidium parvum</i>                           | 312                          | 246                        |
|          |                | <i>Cryptosporidium hominis</i>                          | 354                          | 258                        |

## Prokaryotes

| Category             |  | Species                              | No. of available metabolites | No. of available reactions |
|----------------------|--|--------------------------------------|------------------------------|----------------------------|
| Gamma/Enterobacteria |  | <i>Yersinia pestis</i> CO92          | 992                          | 1012                       |
|                      |  | <i>Yersinia pestis</i> KIM           | 970                          | 972                        |
|                      |  | <i>Yersinia pestis</i> Mediaevails   | 954                          | 976                        |
|                      |  | <i>Yersinia pseudotuberculosis</i>   | 1017                         | 1037                       |
|                      |  | <i>Shigella flexneri</i> 301         | 1031                         | 1060                       |
|                      |  | <i>Shigella flexneri</i> 2457T       | 1016                         | 1041                       |
|                      |  | <i>Erwinia carotovora</i>            | 1020                         | 1066                       |
|                      |  | <i>Photobacterium luminescens</i>    | 991                          | 989                        |
|                      |  | <i>Buchnera aphidicola</i> APS       | 476                          | 391                        |
|                      |  | <i>Buchnera aphidicola</i> Sg        | 466                          | 375                        |
|                      |  | <i>Buchnera aphidicola</i> Bp        | 431                          | 349                        |
|                      |  | <i>Wigglesworthia brevipalpis</i>    | 463                          | 393                        |
|                      |  | <i>Blochmannia floridanus</i>        | 528                          | 451                        |
|                      |  | <i>Haemophilus influenzae</i>        | 735                          | 697                        |
|                      |  | <i>Haemophilus ducreyi</i>           | 576                          | 522                        |
|                      |  | <i>Pasteurella multocida</i>         | 783                          | 779                        |
|                      |  | <i>Mannheimia succiniciproducens</i> | 812                          | 815                        |
|                      |  | <i>Xylella fastidiosa</i> 9a5c       | 706                          | 636                        |
|                      |  | <i>Xylella fastidiosa</i> Temecula1  | 734                          | 660                        |
|                      |  | <i>Xanthomonas campestris</i>        | 960                          | 929                        |
|                      |  | <i>Xanthomonas axonopodis</i>        | 953                          | 915                        |
|                      |  | <i>Xanthomonas oryzae</i>            | 737                          | 601                        |
|                      |  | <i>Vibrio cholerae</i>               | 921                          | 922                        |
|                      |  | <i>Vibrio vulnificus</i> CMCP6       | 955                          | 986                        |
|                      |  | <i>Vibrio vulnificus</i> YJ016       | 977                          | 1008                       |
|                      |  | <i>Vibrio parahaemolyticus</i>       | 961                          | 979                        |

|                                |                                                  |                                            |      |      |
|--------------------------------|--------------------------------------------------|--------------------------------------------|------|------|
| Proteobacteria                 | Gamma/Others                                     | Vibrio fischeri                            | 972  | 982  |
|                                |                                                  | Photobacterium profundum                   | 988  | 1016 |
|                                |                                                  | Pseudomonas aeruginosa                     | 1013 | 991  |
|                                |                                                  | Pseudomonas putida                         | 977  | 951  |
|                                |                                                  | Pseudomonas syringae                       | 966  | 927  |
|                                |                                                  | Acinetobacter sp. ADP1                     | 991  | 927  |
|                                |                                                  | Shewanella oneidensis                      | 910  | 891  |
|                                |                                                  | Idiomarina loihiensis                      | 812  | 774  |
|                                |                                                  | Coxiella burnetii                          | 646  | 581  |
|                                |                                                  | Legionella pneumophila Philadelphia 1      | 789  | 703  |
|                                |                                                  | Legionella pneumophila Lens                | 834  | 788  |
|                                |                                                  | Legionella pneumophila Paris               | 842  | 798  |
|                                |                                                  | Methylococcus capsulatus                   | 787  | 726  |
|                                |                                                  | Francisella tularensis                     | 805  | 748  |
|                                | Beta                                             | Neisseria meningitidis MC58 (serogroup B)  | 704  | 625  |
|                                |                                                  | Neisseria meningitidis Z2491 (serogroup A) | 704  | 631  |
|                                |                                                  | Neisseria gonorrhoeae                      | 559  | 446  |
|                                |                                                  | Chromobacterium violaceum                  | 1071 | 1073 |
|                                |                                                  | Ralstonia solanacearum GMI1000             | 1094 | 1042 |
|                                |                                                  | Burkholderia mallei                        | 893  | 792  |
|                                |                                                  | Burkholderia pseudomallei                  | 834  | 733  |
|                                |                                                  | Bordetella pertussis                       | 904  | 827  |
|                                |                                                  | Bordetella parapertussis                   | 934  | 859  |
|                                |                                                  | Bordetella bronchiseptica                  | 970  | 894  |
|                                |                                                  | Nitrosomonas europaea                      | 832  | 748  |
|                                | Azoarcus sp. EbN1                                | 912                                        | 856  |      |
|                                | Epsilon                                          | Helicobacter pylori 26695                  | 593  | 478  |
|                                |                                                  | Helicobacter pylori J99                    | 590  | 475  |
|                                |                                                  | Helicobacter hepaticus                     | 582  | 517  |
|                                |                                                  | Wolinella succinogenes                     | 573  | 512  |
| Campylobacter jejuni NCTC11168 |                                                  | 578                                        | 506  |      |
| Campylobacter jejuni RM1221    |                                                  | 577                                        | 503  |      |
| Delta                          | Geobacter sulfurreducens                         | 719                                        | 659  |      |
|                                | Desulfovibrio vulgaris Hildenborough             | 716                                        | 638  |      |
|                                | Bdellovibrio bacteriovorus                       | 860                                        | 780  |      |
|                                | Desulfotalea psychrophila                        | 704                                        | 635  |      |
| Alpha                          | Rickettsia prowazekii                            | 396                                        | 289  |      |
|                                | Rickettsia typhi                                 | 422                                        | 327  |      |
|                                | Rickettsia conorii                               | 414                                        | 305  |      |
|                                | Wolbachia wMel                                   | 395                                        | 314  |      |
|                                | Anaplasma marginale                              | 469                                        | 367  |      |
|                                | Ehrlichia ruminantium Welgevonden (South Africa) | 397                                        | 324  |      |
|                                | Mesorhizobium loti                               | 1124                                       | 1110 |      |
|                                | Sinorhizobium meliloti                           | 1156                                       | 1134 |      |
|                                | Agrobacterium tumefaciens C58 (UWash/Dupont)     | 1059                                       | 1017 |      |
|                                | Agrobacterium tumefaciens C58 (Cereon)           | 1059                                       | 1016 |      |
|                                | Brucella melitensis                              | 1034                                       | 989  |      |
|                                | Brucella suis                                    | 959                                        | 880  |      |
|                                | Bradyrhizobium japonicum                         | 1156                                       | 1120 |      |
|                                | Rhodopseudomonas palustris CGA009                | 1103                                       | 1043 |      |
|                                | Bartonella henselae                              | 627                                        | 520  |      |

|                                     |                              |                                       |      |      |
|-------------------------------------|------------------------------|---------------------------------------|------|------|
|                                     |                              | Bartonella quintana                   | 582  | 469  |
|                                     |                              | Caulobacter crescentus                | 936  | 853  |
|                                     |                              | Silicibacter pomeroyi                 | 1015 | 960  |
|                                     |                              | Zymomonas mobilis                     | 767  | 667  |
|                                     |                              | Gluconobacter oxydans                 | 844  | 771  |
| Firmicutes                          | Bacillales                   | Bacillus subtilis                     | 985  | 994  |
|                                     |                              | Bacillus halodurans                   | 962  | 942  |
|                                     |                              | Bacillus anthracis Ames               | 973  | 959  |
|                                     |                              | Bacillus anthracis Ames 0581          | 983  | 961  |
|                                     |                              | Bacillus anthracis A2012              | 971  | 945  |
|                                     |                              | Bacillus anthracis Sterne             | 974  | 964  |
|                                     |                              | Bacillus cereus ATCC 14579            | 1004 | 1001 |
|                                     |                              | Bacillus cereus ATCC 10987            | 1004 | 985  |
|                                     |                              | Bacillus cereus ZK                    | 1031 | 1043 |
|                                     |                              | Bacillus thuringiensis                | 1009 | 1032 |
|                                     |                              | Bacillus licheniformis ATCC 14580     | 974  | 989  |
|                                     |                              | Bacillus licheniformis DSM13          | 985  | 1003 |
|                                     |                              | Bacillus clausii                      | 994  | 1014 |
|                                     |                              | Oceanobacillus iheyensis              | 959  | 921  |
|                                     |                              | Geobacillus kaustophilus              | 971  | 954  |
|                                     |                              | Staphylococcus aureus N315            | 811  | 775  |
|                                     |                              | Staphylococcus aureus Mu50            | 807  | 775  |
|                                     |                              | Staphylococcus aureus MW2             | 811  | 774  |
|                                     |                              | Staphylococcus aureus MRSA252         | 821  | 788  |
|                                     |                              | Staphylococcus aureus MSSA476         | 819  | 784  |
|                                     |                              | Staphylococcus aureus COL             | 815  | 781  |
|                                     |                              | Staphylococcus epidermidis ATCC 12228 | 767  | 734  |
|                                     |                              | Staphylococcus epidermidis RP62A      | 767  | 737  |
|                                     |                              | Listeria monocytogenes EGD-e          | 753  | 742  |
|                                     | Listeria monocytogenes F2365 | 741                                   | 730  |      |
|                                     | Listeria innocua             | 727                                   | 719  |      |
|                                     | Lactobacillales              | Lactococcus lactis                    | 700  | 679  |
|                                     |                              | Streptococcus pyogenes SF370          | 588  | 514  |
|                                     |                              | Streptococcus pyogenes MGAS8232       | 589  | 520  |
|                                     |                              | Streptococcus pyogenes MGAS315        | 591  | 520  |
|                                     |                              | Streptococcus pyogenes SSI-1          | 588  | 518  |
|                                     |                              | Streptococcus pyogenes MGAS10394      | 685  | 640  |
| Streptococcus pneumoniae TIGR4      |                              | 674                                   | 646  |      |
| Streptococcus pneumoniae R6         |                              | 686                                   | 662  |      |
| Streptococcus agalactiae 2603       |                              | 636                                   | 583  |      |
| Streptococcus agalactiae NEM316     |                              | 643                                   | 592  |      |
| Streptococcus mutans                |                              | 671                                   | 640  |      |
| Streptococcus thermophilus CNRZ1066 |                              | 644                                   | 598  |      |
| Streptococcus thermophilus LMG18311 |                              | 644                                   | 599  |      |
| Lactobacillus plantarum             |                              | 811                                   | 789  |      |
| Lactobacillus johnsonii             |                              | 489                                   | 448  |      |
| Lactobacillus acidophilus           |                              | 581                                   | 532  |      |
| Enterococcus faecalis               |                              | 673                                   | 633  |      |
| Clostridia                          |                              | Clostridium acetobutylicum            | 787  | 748  |
|                                     | Clostridium perfringens      | 786                                   | 740  |      |
|                                     | Clostridium tetani E88       | 766                                   | 661  |      |

|                |                                                   |                                         |     |     |
|----------------|---------------------------------------------------|-----------------------------------------|-----|-----|
|                | Mollicutes                                        | <i>Thermoanaerobacter tengcongensis</i> | 692 | 656 |
|                |                                                   | <i>Mycoplasma genitalium</i>            | 284 | 215 |
|                |                                                   | <i>Mycoplasma pneumoniae</i>            | 299 | 229 |
|                |                                                   | <i>Mycoplasma pulmonis</i>              | 301 | 235 |
|                |                                                   | <i>Mycoplasma penetrans</i>             | 390 | 290 |
|                |                                                   | <i>Mycoplasma gallisepticum</i>         | 316 | 238 |
|                |                                                   | <i>Mycoplasma mycoides</i>              | 347 | 284 |
|                |                                                   | <i>Mycoplasma mobile</i>                | 353 | 289 |
|                |                                                   | <i>Mycoplasma hyopneumoniae</i>         | 296 | 216 |
|                |                                                   | <i>Ureaplasma urealyticum</i>           | 238 | 177 |
|                |                                                   | <i>Phytolasma</i> sp. onion yellows     | 205 | 163 |
|                |                                                   | <i>Mesoplasma florum</i>                | 303 | 255 |
| Actinobacteria | <i>Mycobacterium tuberculosis</i> H37Rv           | 966                                     | 894 |     |
|                | <i>Mycobacterium tuberculosis</i> CDC1551         | 970                                     | 895 |     |
|                | <i>Mycobacterium bovis</i>                        | 1002                                    | 935 |     |
|                | <i>Mycobacterium leprae</i>                       | 726                                     | 663 |     |
|                | <i>Mycobacterium avium</i> paratuberculosis       | 971                                     | 901 |     |
|                | <i>Corynebacterium glutamicum</i> (Kitasato)      | 895                                     | 839 |     |
|                | <i>Corynebacterium glutamicum</i> (Bielefeld)     | 868                                     | 807 |     |
|                | <i>Corynebacterium efficiens</i>                  | 841                                     | 791 |     |
|                | <i>Nocardia farcinica</i>                         | 1000                                    | 916 |     |
|                | <i>Corynebacterium diphtheriae</i>                | 769                                     | 723 |     |
|                | <i>Streptomyces coelicolor</i>                    | 1045                                    | 971 |     |
|                | <i>Streptomyces avermitilis</i>                   | 1016                                    | 990 |     |
|                | <i>Tropheryma whipplei</i> Twist                  | 452                                     | 365 |     |
|                | <i>Tropheryma whipplei</i> TW08/27                | 455                                     | 368 |     |
|                | <i>Leifsonia xyli xyli</i> CTCB07                 | 692                                     | 635 |     |
|                | <i>Propionibacterium acnes</i>                    | 821                                     | 807 |     |
|                | <i>Bifidobacterium longum</i>                     | 653                                     | 583 |     |
|                | <i>Symbiobacterium thermophilum</i>               | 718                                     | 653 |     |
| Fusobacteria   | <i>Fusobacterium nucleatum</i>                    | 729                                     | 605 |     |
| Planctomyces   | <i>Rhodopirellula baltica</i>                     | 956                                     | 900 |     |
| Chlamydia      | <i>Chlamydia trachomatis</i>                      | 417                                     | 326 |     |
|                | <i>Chlamydia muridarum</i>                        | 415                                     | 326 |     |
|                | <i>Chlamydophila pneumoniae</i> CWL029            | 425                                     | 347 |     |
|                | <i>Chlamydophila pneumoniae</i> AR39              | 424                                     | 346 |     |
|                | <i>Chlamydophila pneumoniae</i> J138              | 425                                     | 348 |     |
|                | <i>Chlamydophila pneumoniae</i> TW183             | 425                                     | 348 |     |
|                | <i>Chlamydophila caviae</i>                       | 432                                     | 338 |     |
|                | <i>Chlamydophila abortus</i>                      | 266                                     | 191 |     |
|                | <i>Parachlamydia</i> sp. UWE25                    | 464                                     | 385 |     |
| Spirochete     | <i>Borrelia burgdorferi</i>                       | 349                                     | 279 |     |
|                | <i>Borrelia garinii</i>                           | 317                                     | 250 |     |
|                | <i>Treponema pallidum</i>                         | 370                                     | 310 |     |
|                | <i>Treponema denticola</i>                        | 590                                     | 510 |     |
|                | <i>Leptospira interrogans</i> serovar lai         | 926                                     | 811 |     |
|                | <i>Leptospira interrogans</i> serovar Copenhageni | 891                                     | 777 |     |
|                | <i>Synechocystis</i> sp. PCC6803                  | 812                                     | 729 |     |
|                | <i>Synechococcus</i> sp. WH8102                   | 772                                     | 691 |     |
|                | <i>Synechococcus</i> sp. PCC6301                  | 765                                     | 662 |     |
|                | <i>Thermosynechococcus elongatus</i>              | 715                                     | 637 |     |

|                            |                             |                                      |     |     |
|----------------------------|-----------------------------|--------------------------------------|-----|-----|
| Cyanobacteria              |                             | Gloeobacter violaceus                | 784 | 702 |
|                            |                             | Anabaena sp. PCC7120                 | 841 | 762 |
|                            |                             | Prochlorococcus marinus SS120        | 719 | 621 |
|                            |                             | Prochlorococcus marinus MED4         | 715 | 630 |
|                            |                             | Prochlorococcus marinus MIT9313      | 746 | 648 |
| Bacteroid                  |                             | Bacteroides thetaiotaomicron         | 744 | 738 |
|                            |                             | Bacteroides fragilis NCTC9343        | 615 | 515 |
|                            |                             | Porphyromonas gingivalis             | 585 | 497 |
| Green sulfur bacteria      | Chlorobium tepidum          | 711                                  | 610 |     |
| Green nonsulfur bacteria   | Dehalococcoides ethenogenes | 473                                  | 382 |     |
| Deinococcus–Thermus        |                             | Deinococcus radiodurans              | 850 | 820 |
|                            |                             | Thermus thermophilus HB27            | 863 | 831 |
|                            |                             | Thermus thermophilus HB8             | 840 | 811 |
| Hyperthermophilic bacteria |                             | Aquifex aeolicus                     | 641 | 550 |
|                            |                             | Thermotoga maritima                  | 661 | 638 |
| Archaea                    | Euryarchaeota               | Methanococcus jannaschii             | 513 | 392 |
|                            |                             | Methanococcus maripaludis            | 537 | 419 |
|                            |                             | Methanosarcina acetivorans           | 642 | 530 |
|                            |                             | Methanosarcina mazei                 | 674 | 548 |
|                            |                             | Methanobacterium thermoautotrophicum | 538 | 414 |
|                            |                             | Methanopyrus kandleri                | 474 | 344 |
|                            |                             | Archaeoglobus fulgidus               | 633 | 481 |
|                            |                             | Halobacterium sp. NRC-1              | 577 | 486 |
|                            |                             | Haloarcula marismortui               | 840 | 747 |
|                            |                             | Thermoplasma acidophilum             | 610 | 497 |
|                            |                             | Thermoplasma volcanium               | 609 | 494 |
|                            |                             | Picrophilus torridus                 | 773 | 662 |
|                            |                             | Pyrococcus horikoshii                | 492 | 365 |
|                            |                             | Pyrococcus abyssi                    | 548 | 421 |
|                            |                             | Pyrococcus furiosus                  | 575 | 456 |
|                            | Thermococcus kodakaraensis  | 540                                  | 415 |     |
|                            | Crenarchaeota               | Aeropyrum pernix                     | 586 | 460 |
|                            |                             | Sulfolobus solfataricus              | 776 | 617 |
|                            |                             | Sulfolobus tokodaii                  | 696 | 553 |
|                            |                             | Pyrobaculum aerophilum               | 656 | 526 |
