# Supplementary material
Source: PubMed Central journal article supplement (PMC1959434)

**2** *In silico* analysis of metabolite essentiality

**1** Functional genomics

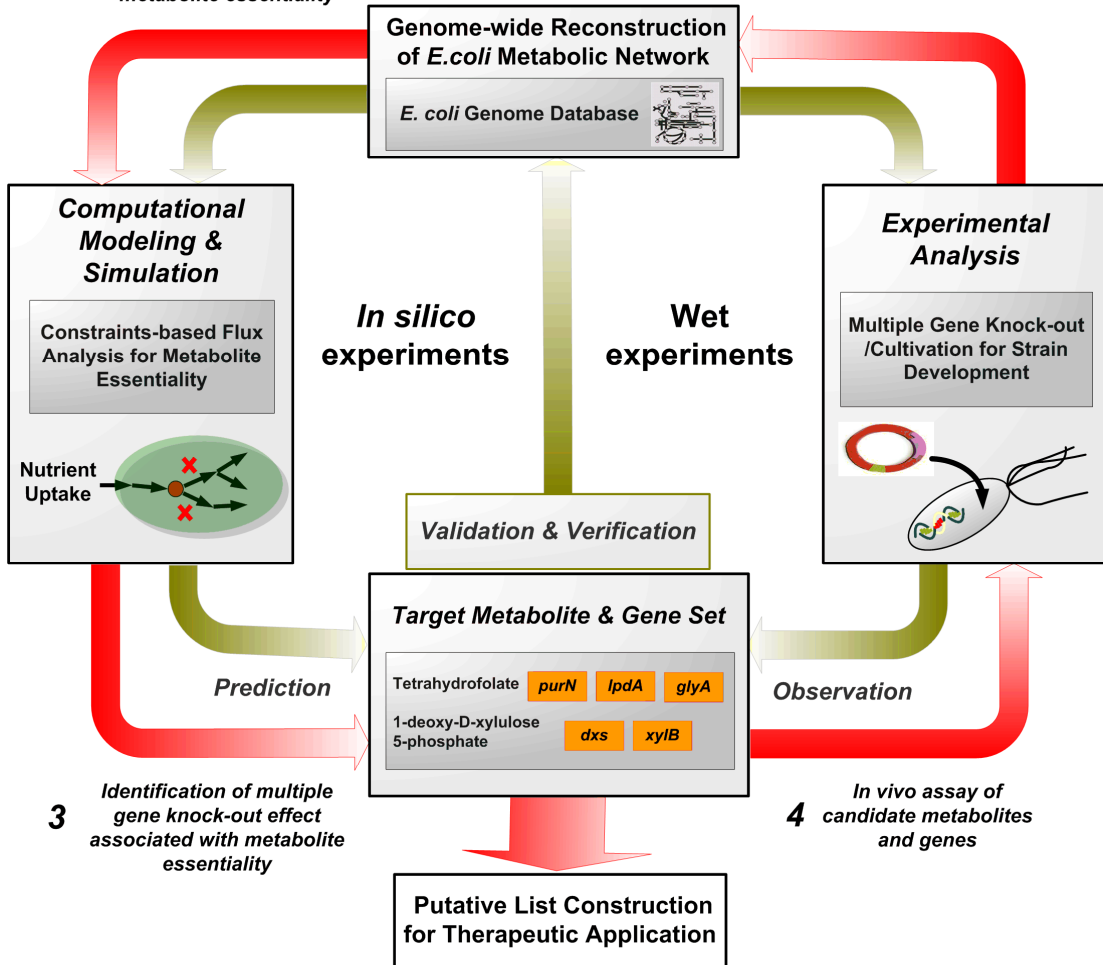

Supplement: pnas_0703262104_1.pdf [file pnas_0703262104_1.pdf]

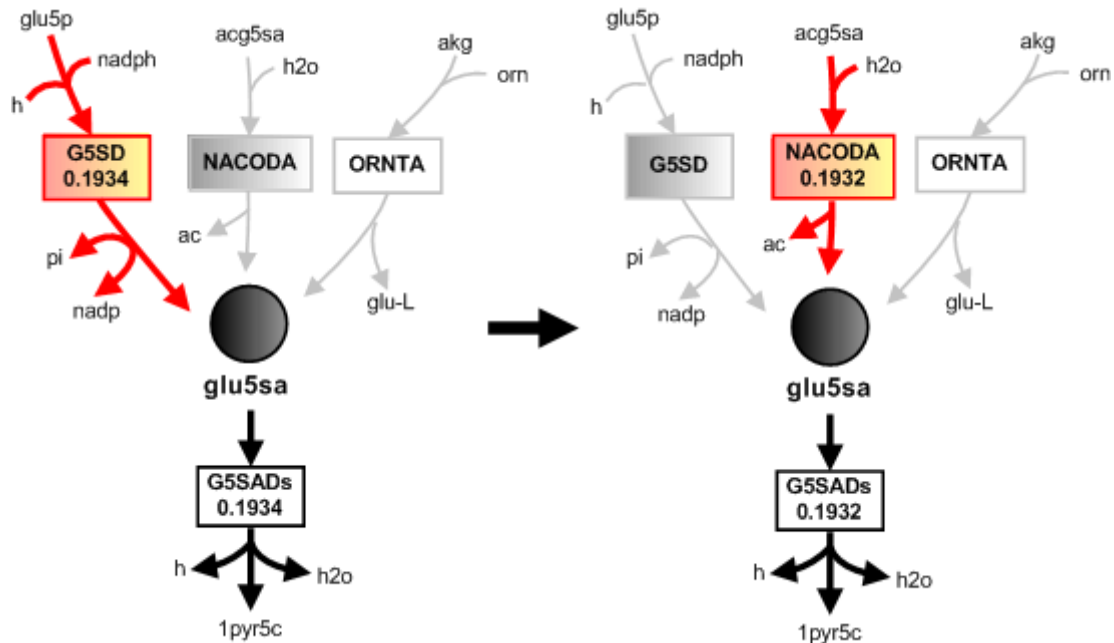

Supplement: pnas_0703262104_10.pdf [file pnas_0703262104_10.pdf]

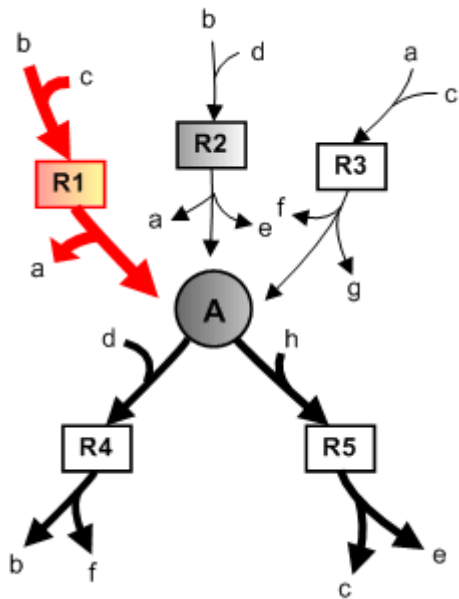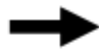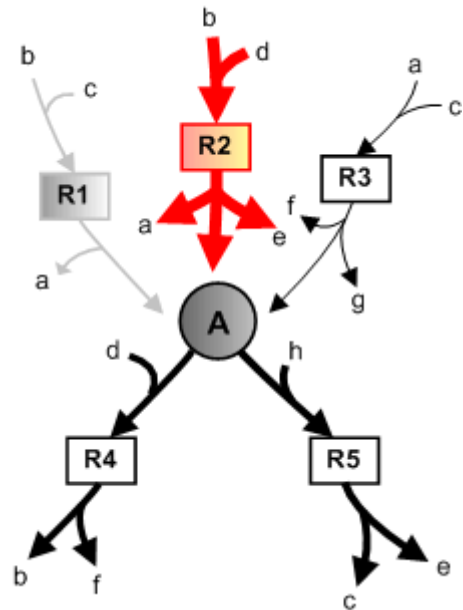

Supplement: pnas_0703262104_11.pdf [file pnas_0703262104_11.pdf]

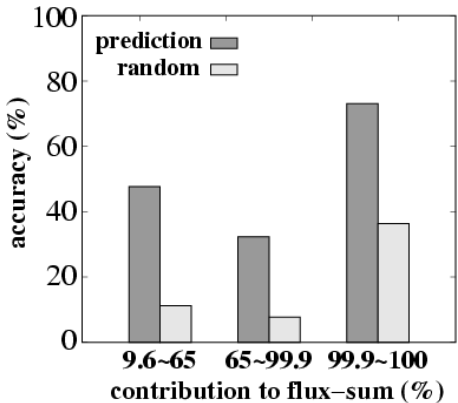

Supplement: pnas_0703262104_12.pdf [file pnas_0703262104_12.pdf]

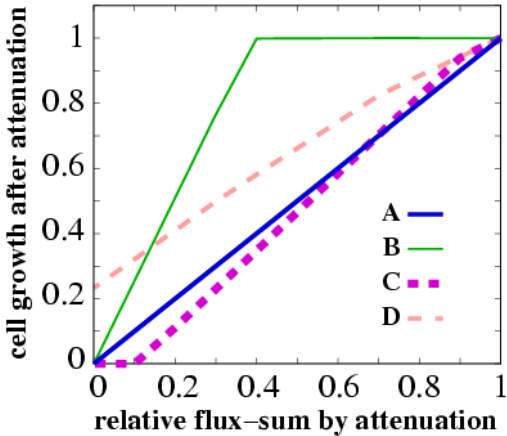

Supplement: pnas_0703262104_13.pdf [file pnas_0703262104_13.pdf]

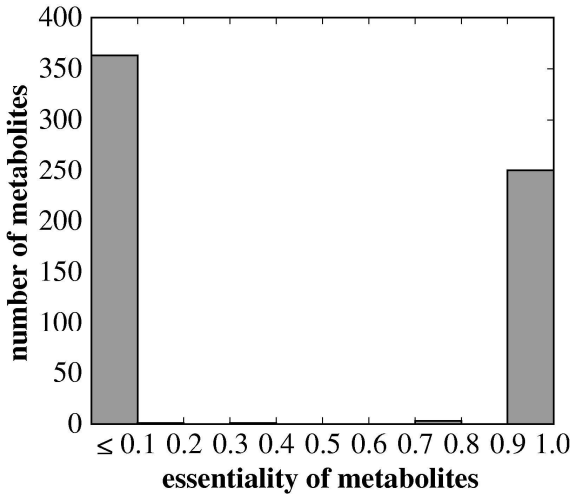

Supplement: pnas_0703262104_2.pdf [file pnas_0703262104_2.pdf]

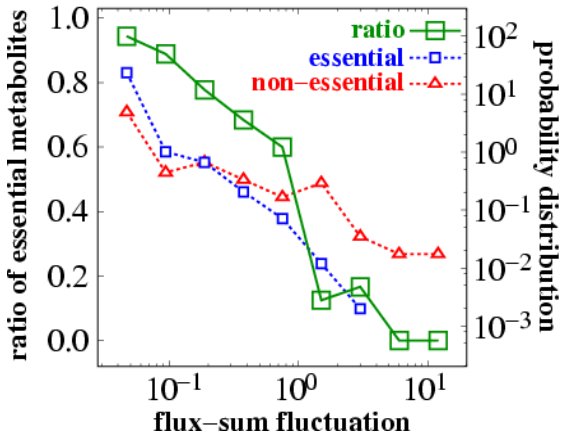

Supplement: pnas_0703262104_3.pdf [file pnas_0703262104_3.pdf]

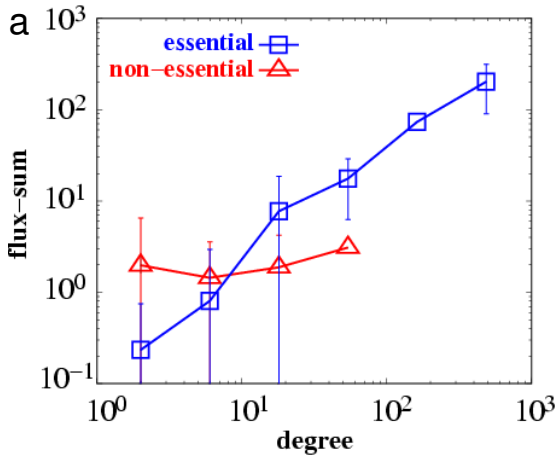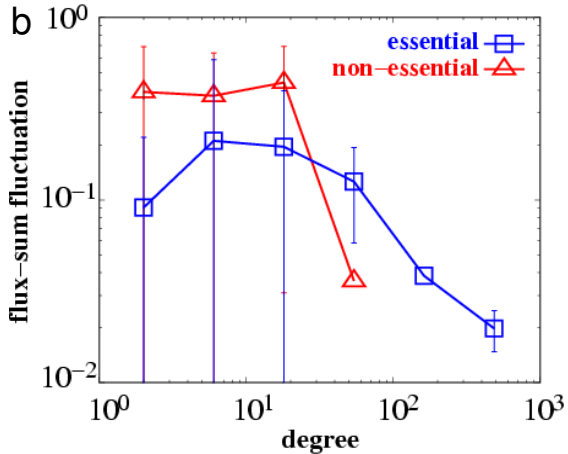

Supplement: pnas_0703262104_4.pdf [file pnas_0703262104_4.pdf]

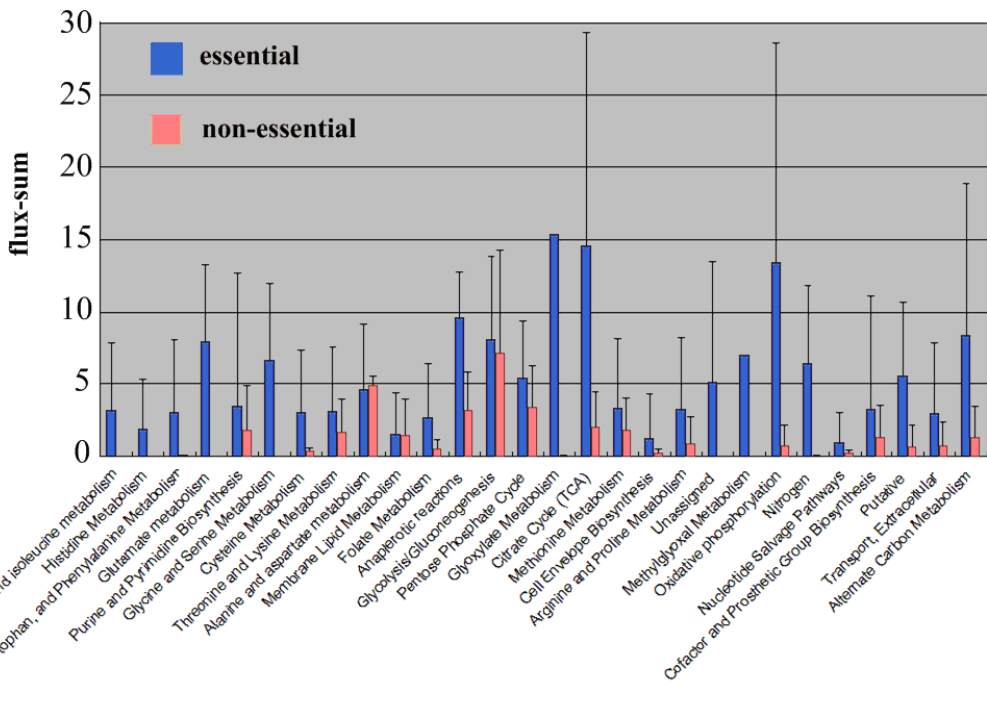

Supplement: pnas_0703262104_5.pdf [file pnas_0703262104_5.pdf]

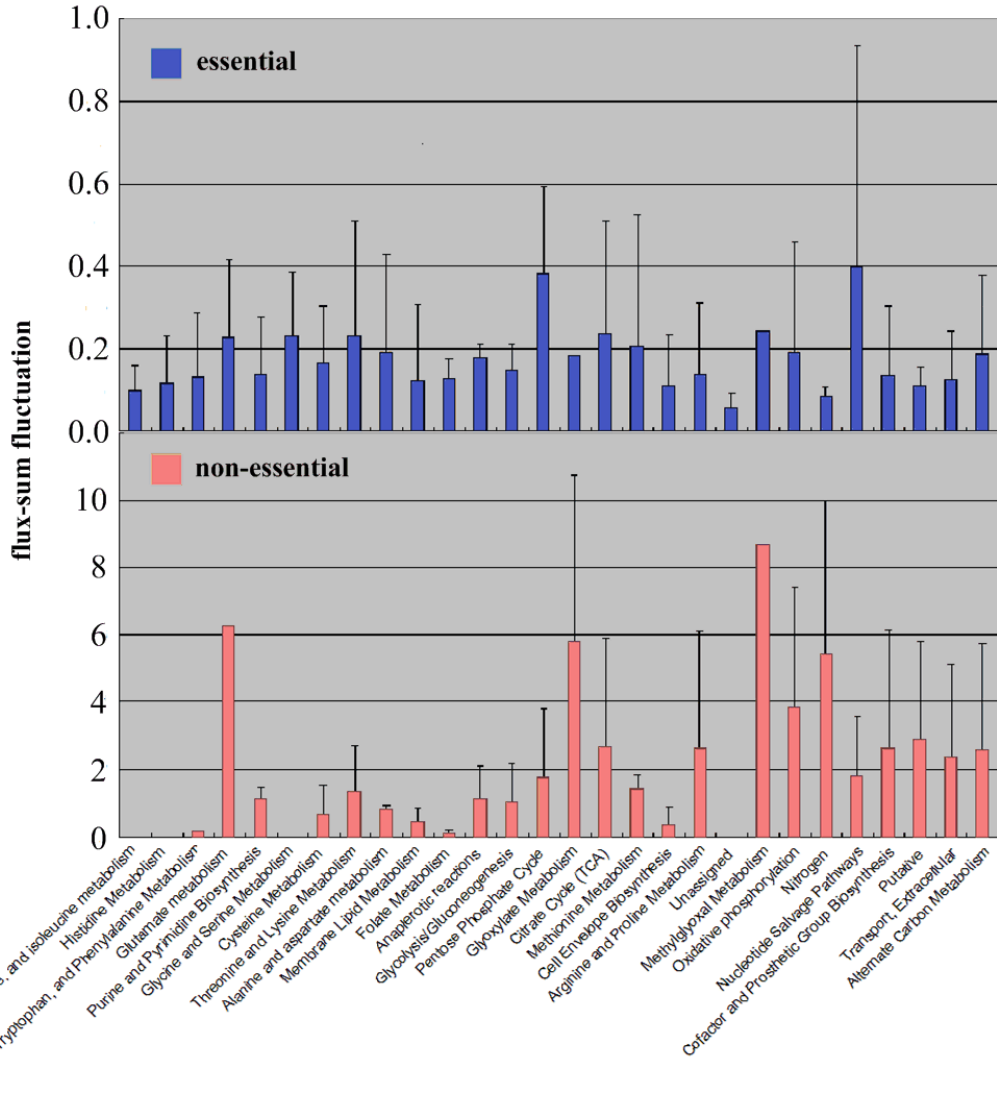

Supplement: pnas_0703262104_6.pdf [file pnas_0703262104_6.pdf]

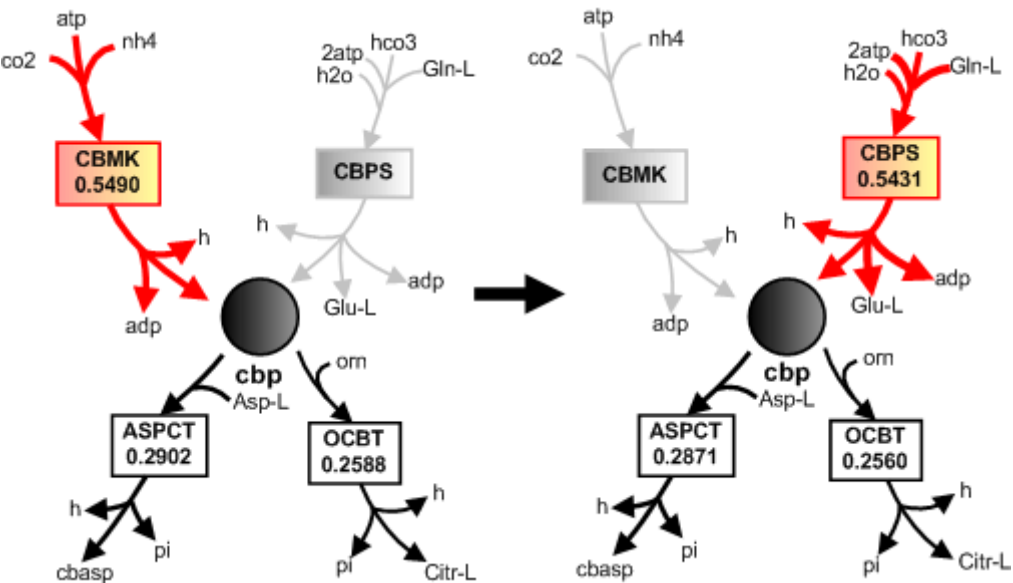

Supplement: pnas_0703262104_7.pdf [file pnas_0703262104_7.pdf]

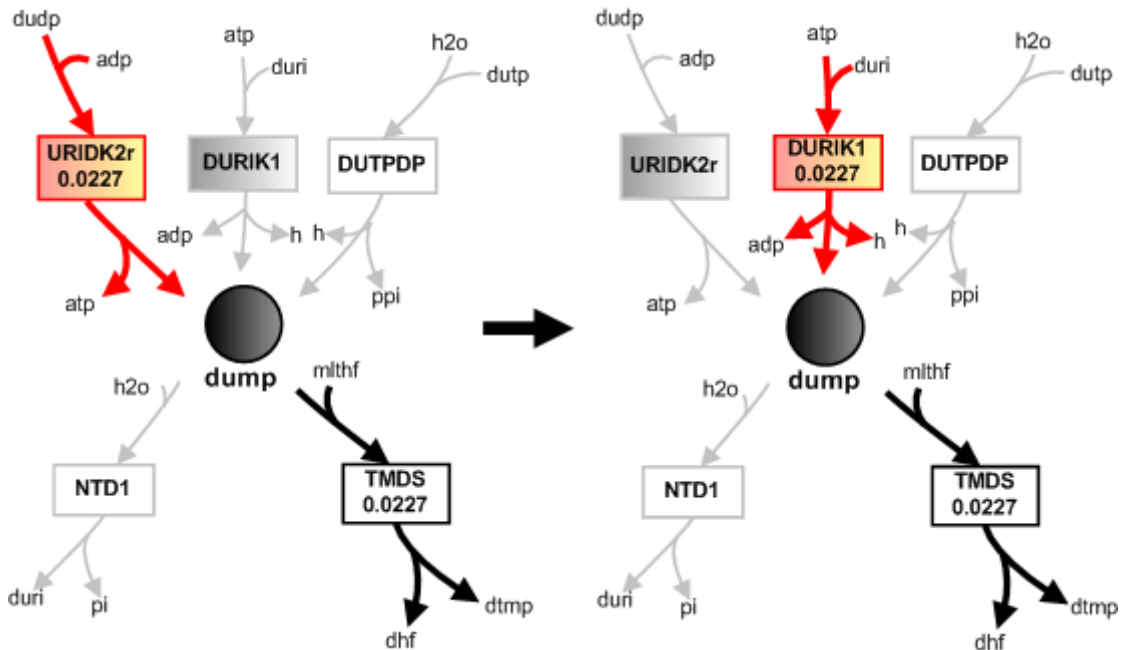

Supplement: pnas_0703262104_8.pdf [file pnas_0703262104_8.pdf]

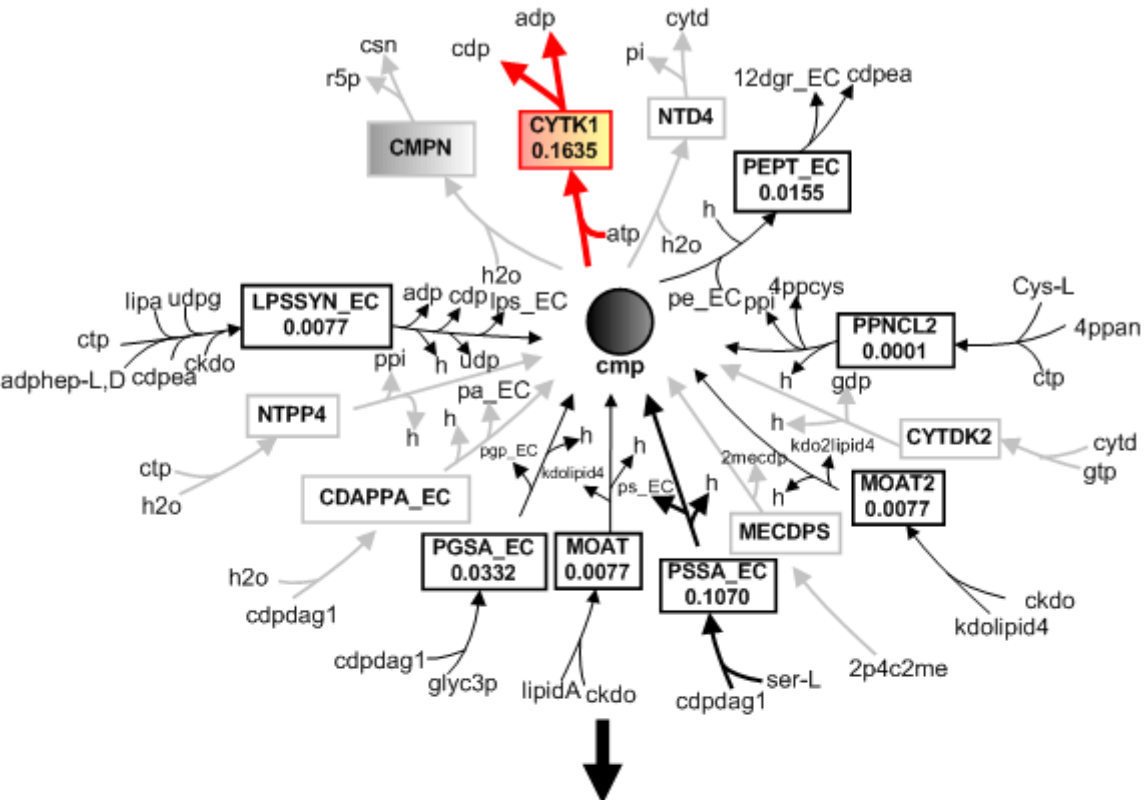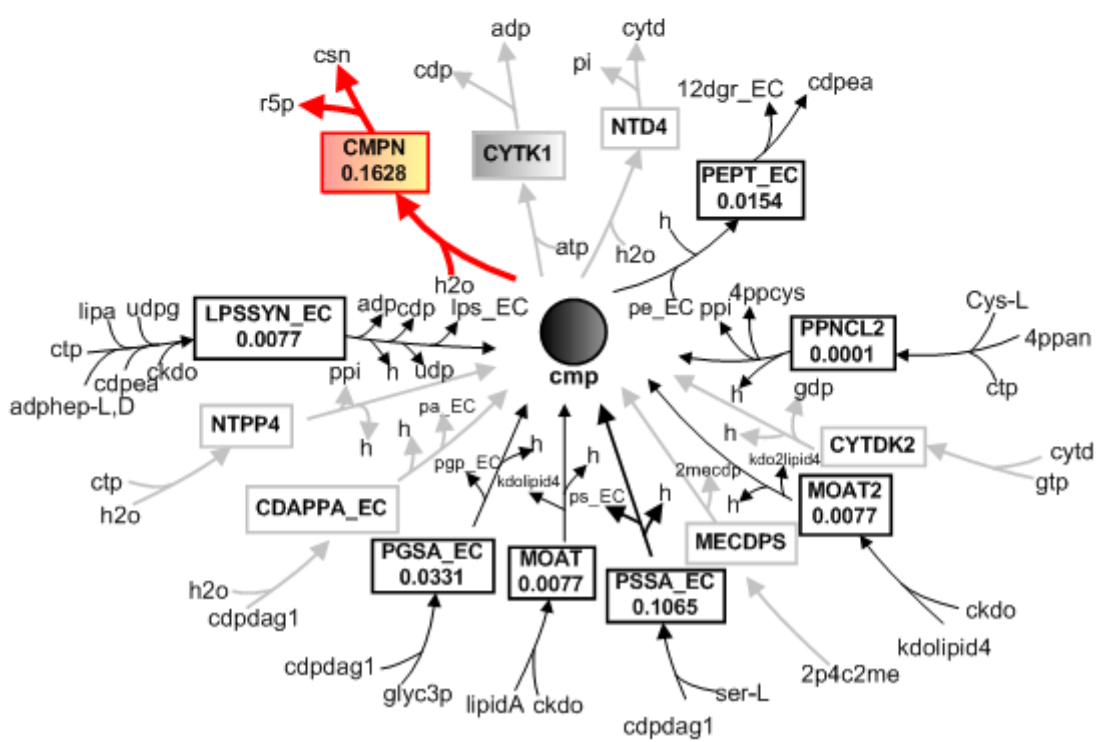

Supplement: pnas_0703262104_9.pdf [file pnas_0703262104_9.pdf]
